# Supplementary material
Source: PubMed Central journal article supplement (PMC6693001)
Supplement: baADV2019000572-suppl1.pdf [file baADV2019000572-suppl1.pdf]

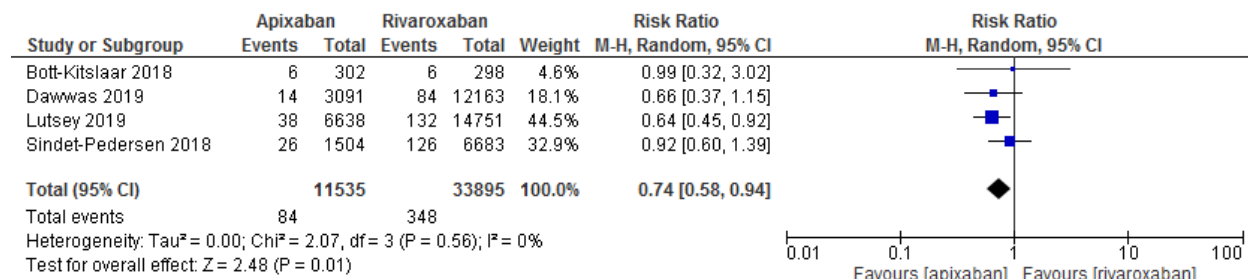

### Supplementary file figure 1 – (removing Howe et al.) – sensitivity analysis

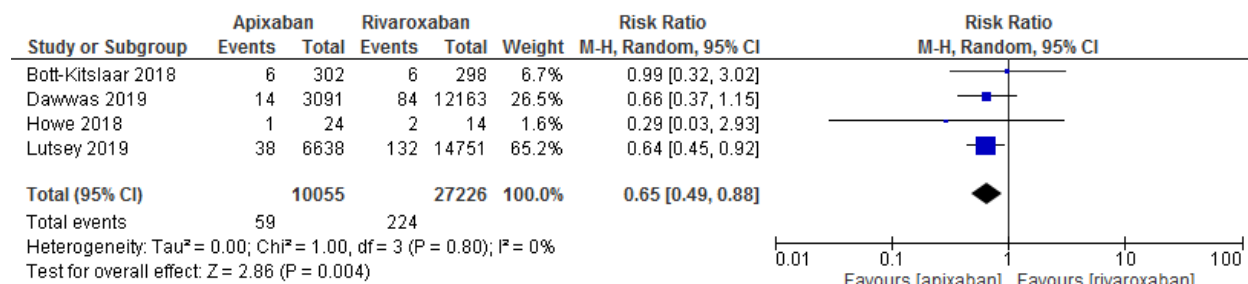

### Supplementary file figure 2 – (removing Sindet-Pederson et al.) – sensitivity analysis

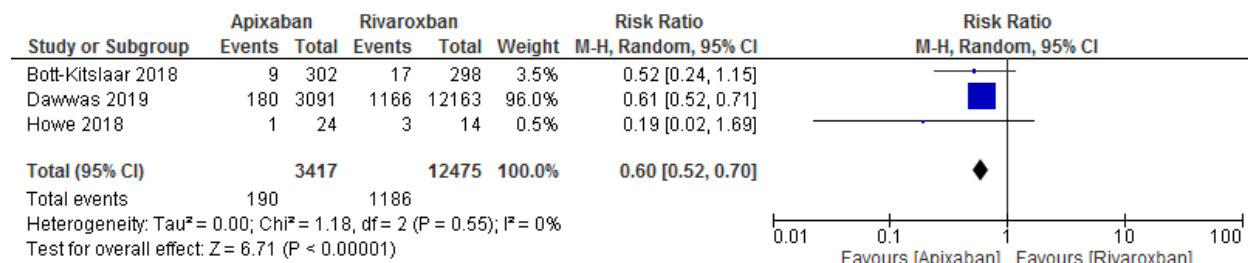

### Supplementary file figure 3: composite of major and minor bleeding

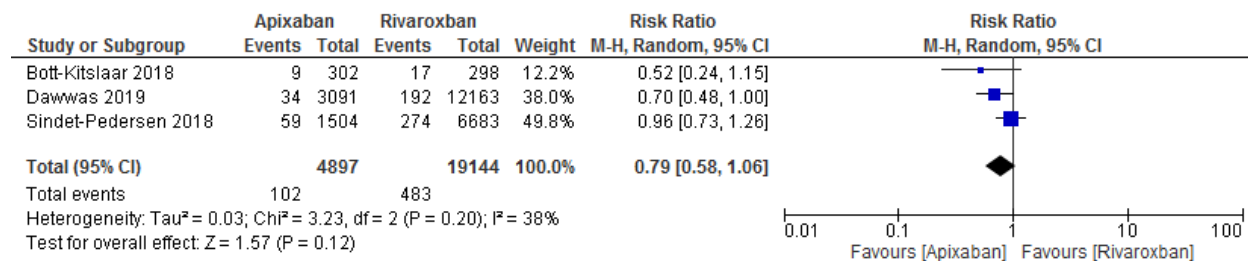

### Supplementary file figure 4: composite of major bleeding and VTE recurrence

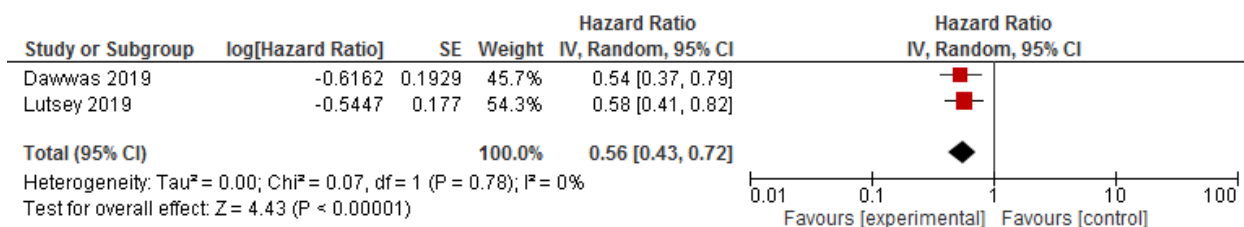

### Supplementary file figure 5: HR of major bleeding in 3 months

| Outcome                                                                                        | Number of studies | Number of Patients | Risk ratio ( 95% CI) | P value | Heterogeneity (I <sup>2</sup> %) |
|------------------------------------------------------------------------------------------------|-------------------|--------------------|----------------------|---------|----------------------------------|
| <b>Apixaban vs. Rivaroxaban</b>                                                                |                   |                    |                      |         |                                  |
| Recurrent VTE                                                                                  | 3                 | 24,041             | 0.89 (0.67 – 1.19)   | 0.45    | 0%                               |
| Major Bleeding                                                                                 | 5                 | 45,468             | 0.73 (0.58 – 0.93)   | 0.010   | 0%                               |
| Minor Bleeding                                                                                 | 3                 | 15,892             | 0.59 (0.50 – 0.70)   | <0.01   | 0%                               |
| Composite of major and minor bleeding                                                          | 2                 | 15,854             | 0.60 (0.52 – 0.69)   | <0.01   | 0%                               |
| Composite of VTE and major bleeding                                                            | 3                 | 24,041             | 0.77 (0.58– 1.06)    | 0.12    | 38%                              |
| Hazard ratio for major bleeding at 3 months: 0.56 (CI: 0.43-0.72, I <sup>2</sup> : 0%, P<0.01) |                   |                    |                      |         |                                  |

**Supplementary Table 1: Total number of efficacy and safety end point events in apixaban and rivaroxaban patients**

CI = confidence interval

VTE = venous thromboembolism

| Included studies              | Selection                             |                                              |                           |                                                  | Comparability         |                                         | Outcome                |                                     | Classification |
|-------------------------------|---------------------------------------|----------------------------------------------|---------------------------|--------------------------------------------------|-----------------------|-----------------------------------------|------------------------|-------------------------------------|----------------|
|                               | Representative-ness of exposure group | Representative-ness of the non-exposed group | Ascertainment of exposure | Determination that outcome not present initially | Comparison of cohorts | Assessment of outcome                   | Long enough follow-up? | Adequacy of follow-up?              |                |
| <u>Sindet-Pedersen (2018)</u> | Yes                                   | Yes                                          | Secure record             | Yes                                              | Yes                   | Reported                                | Yes (3 mos and 6 mos)  | No (lost to follow-up not reported) | 7              |
| <u>Lutsey (2019)</u>          | Yes                                   | Yes                                          | Secure record             | Yes                                              | Yes                   | Major bleeding reported (minor missing) | Yes (90 days)          | No (lost to follow-up not reported) | 6              |
| <u>Bott-Kitslaar (2018)</u>   | Yes                                   | Yes                                          | No - Not reported         | Yes                                              | Yes                   | Reported                                | Yes (3 mos)            | No (lost to follow-up not reported) | 6              |
| <u>Dawwas (2019)</u>          | Yes                                   | Yes                                          | Secure record             | Yes                                              | Yes                   | Reported                                | Yes (99 days)          | No (lost to follow-up not reported) | 7              |
| <u>Howe (2018)</u>            | Yes                                   | Yes                                          | Secure record             | Yes                                              | Yes                   | Reported                                | Yes (180 days)         | No (lost to follow-up not reported) | 7              |

**Supplementary Table 2: Assessment of the quality of included studies (Newcastle-Ottawa Scale used for determination of quality)**
